# Supplementary material for: Controlled growth of NiMoO4·H2O nanoflake and nanowire arrays on Ni foam for superior performance of asymmetric supercapacitors
Source: Royal Society of Chemistry journal article supplement (doi:10.1039/c6ra13483a), 2016-01-01
Supplement: c6ra13483a1.pdf [file c6ra13483a1.pdf]

## Electronic Supplementary Information

Chen Qing, Yanan Liu, Xiaodan Sun, Xiaxia OuYang, Hai Wang, Daming Sun, Bixiao Wang, Qin Zhou, Lifeng Xu, Yiwen Tang\*

*<sup>a</sup>Institute of Nano-science and Technology, College of Physical Science and Technology, Central China Normal University, Wuhan, 430079, China*

E-mail: ywtang@phy.ccnu.edu.cn; [chenqing@mails.ccnu.edu.cn](mailto:chenqing@mails.ccnu.edu.cn)

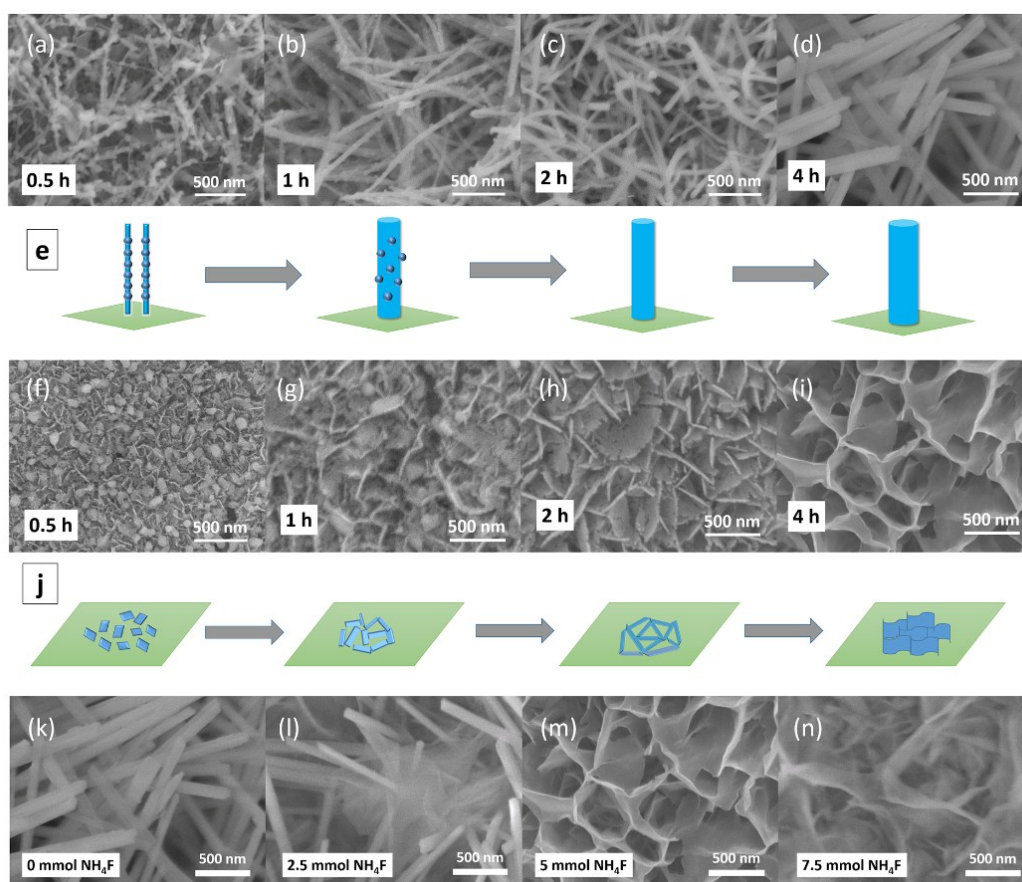

**Fig. S1** SEM images of the H-NW obtained without adding NH<sub>4</sub>F at different reaction time to (a) 0.5 h, (b) 1 h, (c) 2 h, (d) 4 h; (e) scheme of the H-NW at various reaction stages; SEM images of the H-NF obtained with the assistance of 5 mmol NH<sub>4</sub>F at various reaction stages by setting the reaction time to (f) 0.5 h, (g) 1 h, (h) 2 h, (i) 4 h; (j) proposed scheme of the H-NF at various reaction section; SEM images of the products obtained at different concentration of NH<sub>4</sub>F (k-n).

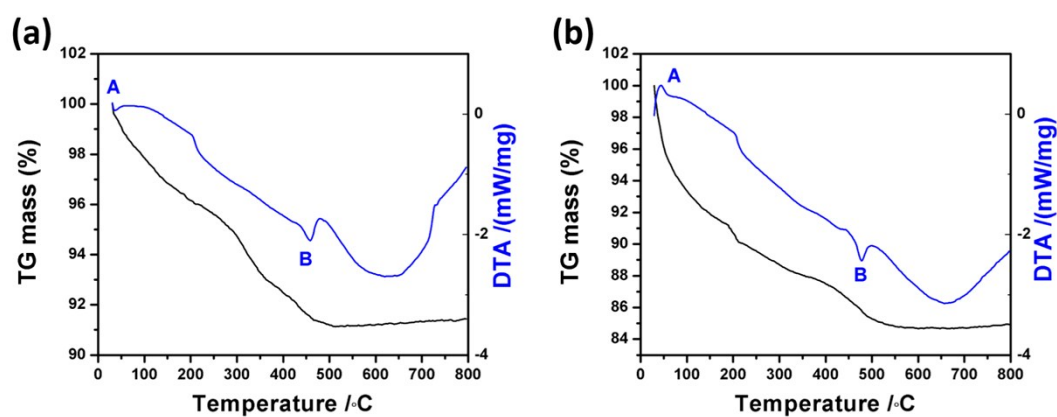

Fig. S2 TGA curves of the H-NW(a) and H-NF(b).

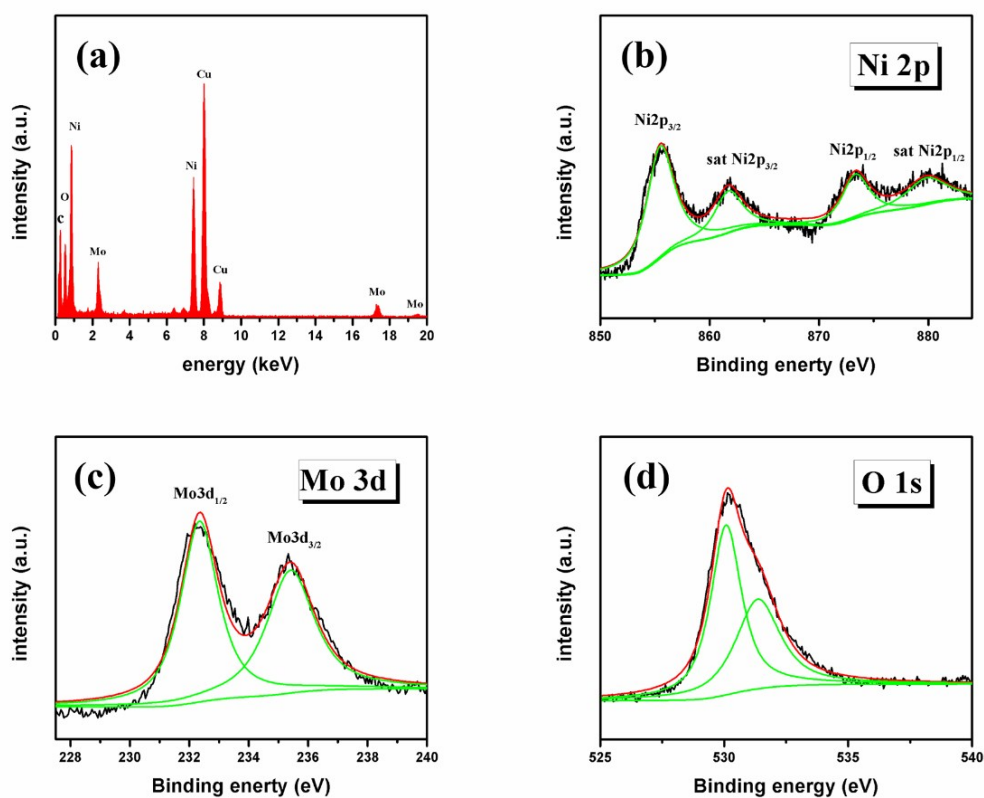

Fig. S3 a) the EDS of H-NW and H-NF; XPS spectra of H-NF scratched from Ni foam: (b) Ni 2p spectrum, (c) Mo 3d spectrum, and (d) O 1s spectrum.

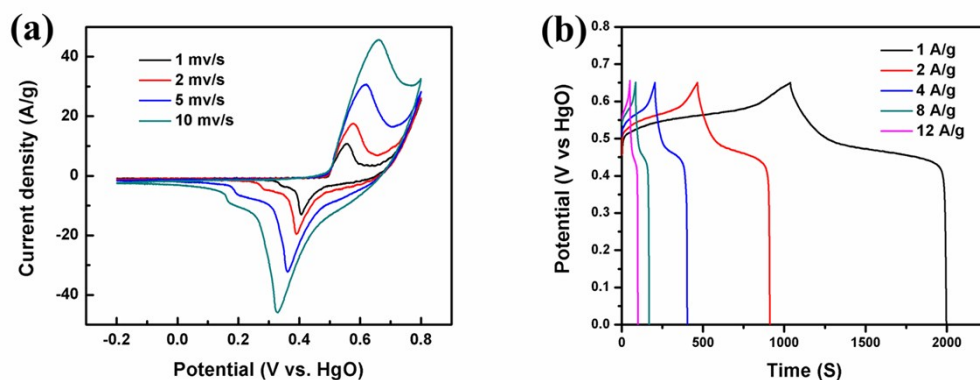

**Fig. S4** a) CV curves of H-NF at different scan rates from 1 to 10 mV s<sup>-1</sup>. b) galvanostatic charge/discharge voltage profiles of H-NF at various current densities in the voltage range

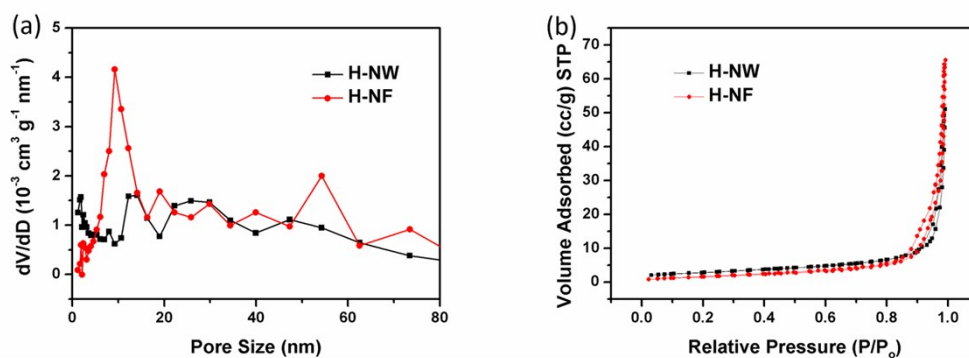

**Fig. S5** N<sub>2</sub> pore size distributions (a) and adsorption-desorption isotherms (b) of H-NW and H-NF.

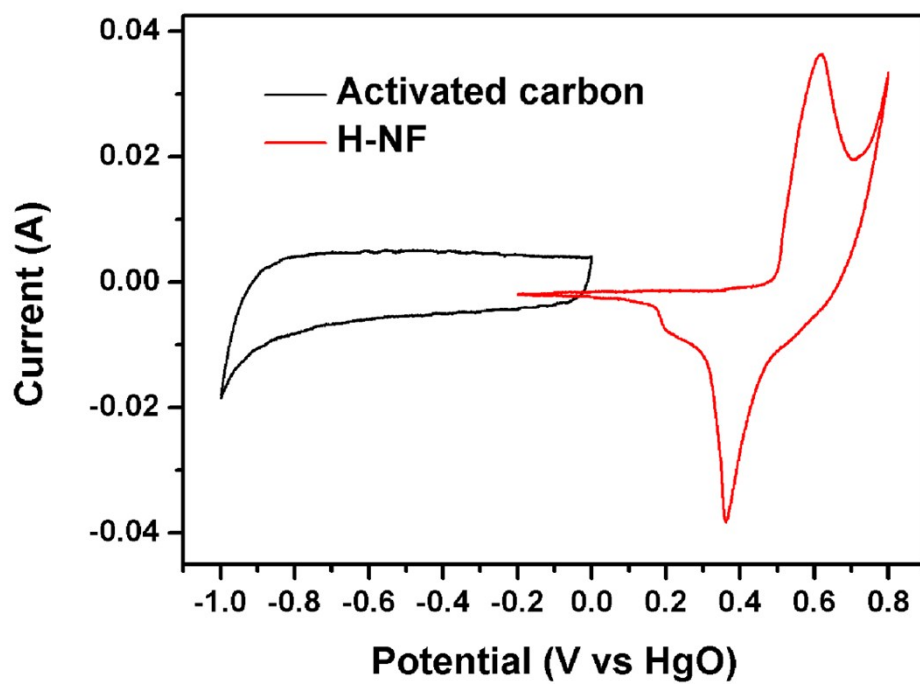

**Fig. S6** Comparative CV curves of activated carbon and H-NF electrodes performed in three-electrode system in 2 M KOH electrolyte at a scan rate of 5 mV s<sup>-1</sup>.
